# Supplementary material
Source: PubMed Central journal article supplement (PMC3497419)
Supplement: IAI.00880-12_zii999099911so1.pdf [file IAI.00880-12_zii999099911so1.pdf]

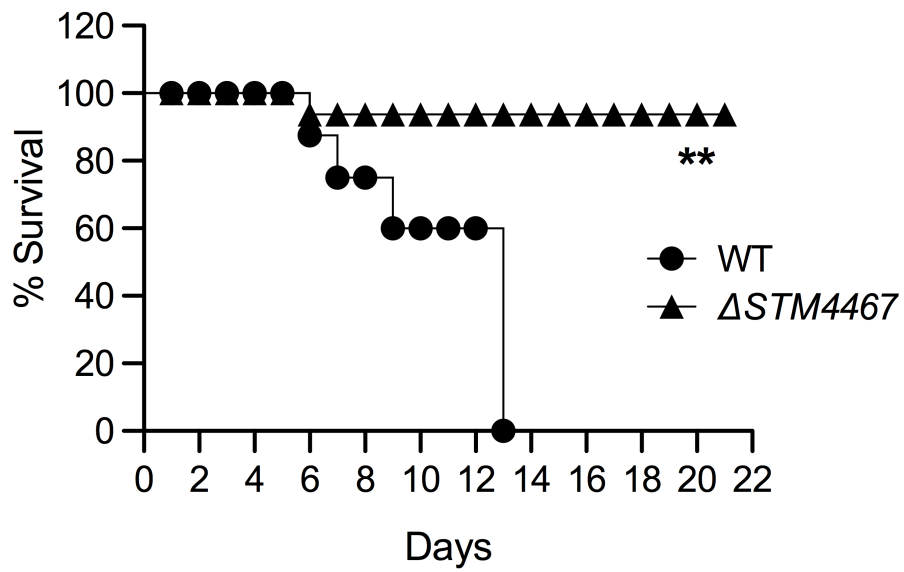

**Figure S1.** Groups of C3H/HeN mice (5 mice / group) were injected intraperitoneally with  $\sim 10^4$  cells of the wild-type (14028s, WT) and *STM4467* deletion (CH102,  $\Delta STM4467$ ) strains. The survival of the mice was monitored daily for three weeks.
